# Supplementary material for: Air quality modelling in the summer over the EasternMediterranean using WRF/Chem: Chemistry and aerosolmechanisms intercomparison
Source: Copernicus journal article supplement (doi:10.5194/acp-2017-781), 2017-09-19
Supplement: Supplementary file [file acp-2017-781-AC2-supplement.pdf]

# **Supplement to "Air quality modelling in the summer over the Eastern Mediterranean using WRF/Chem: Chemistry and aerosol mechanisms intercomparison"**

George K. Georgiou<sup>1</sup>, Theodoros Christoudias<sup>2</sup>, Yiannis Proestos<sup>1</sup>, Jonilda Kushta<sup>1</sup>,  
Panos Hadjinicolaou<sup>1</sup>, and Jos Lelieveld<sup>3,1</sup>

<sup>1</sup>Energy, Environment and Water Research Center, The Cyprus Institute, Nicosia Cyprus

<sup>2</sup>Computation-based Science and Technology Research Centre (CaSToRC), The Cyprus Institute, Nicosia, Cyprus

<sup>3</sup>Air Chemistry Department, Max Planck Institute for Chemistry, Mainz, Germany

*Correspondence to:* George K. Georgiou (g.georgiou@cyi.ac.cy)

**Table S1.** Pearson’s Correlation Coefficient (R), Mean Bias (MB), Normalized Mean Bias (NMB), and Root Mean Squared Error (RMSE) of hourly values of temperature at 2m, wind speed at 10m, and surface pressure for the CBMZ-MOSAIC (CM), MOZART-MOSAIC (MM), and RADM2-MADE/SORGAM (RMS) mechanisms, with O<sub>3</sub> inflow (reduced by 30%), and dust inflow from the boundaries. Hourly data availability exceeds 90% at all stations.

|                        | Station        | CBMZ-MOSAIC    |              |              |             | MOZART-MOSAIC |              |              |             | RADM2-MADE/SORGAM |              |              |             |
|------------------------|----------------|----------------|--------------|--------------|-------------|---------------|--------------|--------------|-------------|-------------------|--------------|--------------|-------------|
|                        |                | R              | MB           | NMB          | RMSE        | R             | MB           | NMB          | RMSE        | R                 | MB           | NMB          | RMSE        |
| <b>T2</b>              | CYPHEX         | 0.70           | 0.65         | 0.03         | 2.34        | 0.69          | 0.49         | 0.02         | 2.36        | 0.68              | 0.69         | 0.03         | 2.42        |
|                        | MET01          | 0.88           | -0.45        | -0.02        | 2.28        | 0.88          | -0.75        | -0.03        | 2.30        | 0.89              | -0.50        | -0.02        | 2.21        |
|                        | MET02          | 0.18           | -1.46        | -0.05        | 3.29        | 0.18          | -1.48        | -0.05        | 3.32        | 0.17              | -1.45        | -0.05        | 3.31        |
|                        | MET03          | 0.65           | -0.75        | -0.03        | 2.84        | 0.65          | -0.86        | -0.03        | 2.89        | 0.67              | -0.84        | -0.03        | 2.80        |
|                        | MET04          | 0.68           | -1.47        | -0.06        | 2.54        | 0.70          | -1.6         | -0.06        | 2.56        | 0.71              | -1.58        | -0.06        | 2.55        |
|                        | MET05          | 0.70           | 0.37         | 0.01         | 2.69        | 0.72          | 0.19         | 0.01         | 2.66        | 0.72              | 0.17         | 0.01         | 2.61        |
|                        | MET06          | 0.74           | -0.84        | -0.03        | 2.64        | 0.76          | -1.05        | -0.04        | 2.65        | 0.79              | -0.86        | -0.03        | 2.46        |
|                        | MET07          | 0.80           | -1.39        | -0.06        | 2.75        | 0.80          | -1.74        | -0.08        | 2.95        | 0.78              | -1.30        | -0.06        | 2.80        |
|                        | MET08          | 0.61           | 0.03         | 0.00         | 3.22        | 0.60          | -0.06        | 0.00         | 3.32        | 0.60              | -0.01        | -0.00        | 3.29        |
|                        | <b>Average</b> | <b>0.66</b>    | <b>-0.59</b> | <b>-0.02</b> | <b>2.73</b> | <b>0.66</b>   | <b>-0.76</b> | <b>-0.03</b> | <b>2.78</b> | <b>0.67</b>       | <b>-0.63</b> | <b>-0.02</b> | <b>2.72</b> |
| <b>PSFC</b>            | CYPHEX         | 0.81           | 45.88        | 0.05         | 45.90       | 0.81          | 46.04        | 0.05         | 46.05       | 0.80              | 45.81        | 0.05         | 45.83       |
|                        | MET01          | 0.87           | 0.10         | 0.00         | 1.26        | 0.87          | 0.31         | 0.00         | 1.29        | 0.86              | 0.07         | 0.00         | 1.35        |
|                        | MET02          | 0.88           | -2.03        | 0.00         | 2.37        | 0.88          | -1.83        | 0.00         | 2.19        | 0.87              | -2.08        | 0.00         | 2.46        |
|                        | MET03          | 0.88           | -10.07       | -0.01        | 10.15       | 0.88          | -9.88        | -0.01        | 9.95        | 0.87              | -10.14       | -0.01        | 10.23       |
|                        | MET04          | 0.91           | -2.19        | 0.00         | 2.44        | 0.91          | -1.96        | 0.00         | 2.23        | 0.90              | -2.25        | 0.00         | 2.54        |
|                        | MET06          | 0.90           | -10.91       | -0.01        | 10.97       | 0.89          | -10.68       | -0.01        | 10.75       | 0.89              | -10.98       | -0.01        | 11.05       |
|                        |                | <b>Average</b> | <b>0.88</b>  | <b>3.46</b>  | <b>0.01</b> | <b>12.18</b>  | <b>0.87</b>  | <b>3.67</b>  | <b>0.01</b> | <b>12.08</b>      | <b>0.87</b>  | <b>3.41</b>  | <b>0.01</b> |
| <b>WS<sub>10</sub></b> | CYPHEX         | 0.36           | 0.05         | 0.02         | 1.63        | 0.36          | 0.09         | 0.03         | 1.66        | 0.35              | -0.01        | 0.00         | 1.63        |
|                        | MET01          | 0.52           | 2.24         | 1.09         | 2.99        | 0.53          | 2.34         | 1.13         | 3.06        | 0.49              | 2.167        | 1.05         | 2.94        |
|                        | MET02          | 0.55           | 0.32         | 0.07         | 2.70        | 0.56          | 0.41         | 0.09         | 2.71        | 0.56              | 0.27         | 0.06         | 2.64        |
|                        | MET03          | 0.62           | 3.37         | 1.51         | 3.82        | 0.61          | 3.49         | 1.57         | 3.93        | 0.58              | 3.33         | 1.50         | 3.80        |
|                        | MET04          | 0.48           | 0.02         | 0.00         | 1.84        | 0.49          | 0.09         | 0.02         | 1.84        | 0.47              | -0.11        | -0.03        | 1.88        |
|                        | MET05          | 0.46           | 2.02         | 1.22         | 2.54        | 0.47          | 2.09         | 1.26         | 2.59        | 0.44              | 2.03         | 1.23         | 2.55        |
|                        | MET06          | 0.46           | 1.51         | 0.93         | 1.96        | 0.46          | 1.56         | 0.96         | 2.02        | 0.48              | 1.54         | 0.94         | 1.96        |
|                        | MET07          | 0.27           | 2.45         | 2.34         | 3.04        | 0.27          | 2.53         | 2.41         | 3.11        | 0.26              | 2.44         | 2.337        | 3.01        |
|                        | MET08          | 0.52           | 3.82         | 4.33         | 4.37        | 0.50          | 3.91         | 4.43         | 4.49        | 0.53              | 3.74         | 4.24         | 4.26        |
|                        | <b>Average</b> | <b>0.47</b>    | <b>1.76</b>  | <b>1.28</b>  | <b>2.77</b> | <b>0.47</b>   | <b>1.83</b>  | <b>1.32</b>  | <b>2.82</b> | <b>0.46</b>       | <b>1.71</b>  | <b>1.26</b>  | <b>2.74</b> |

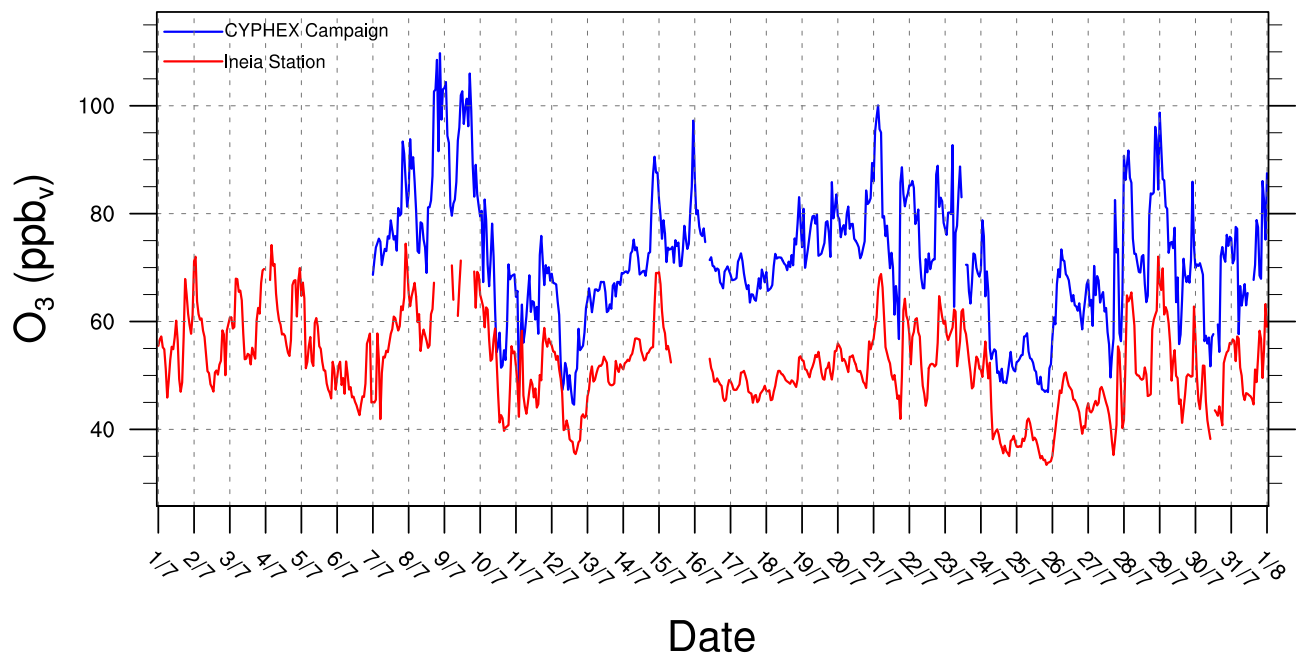

**Figure S1.** Observed O<sub>3</sub> concentrations during the CYPHEX Campaign (blue line) and at the Ineia station (red line).

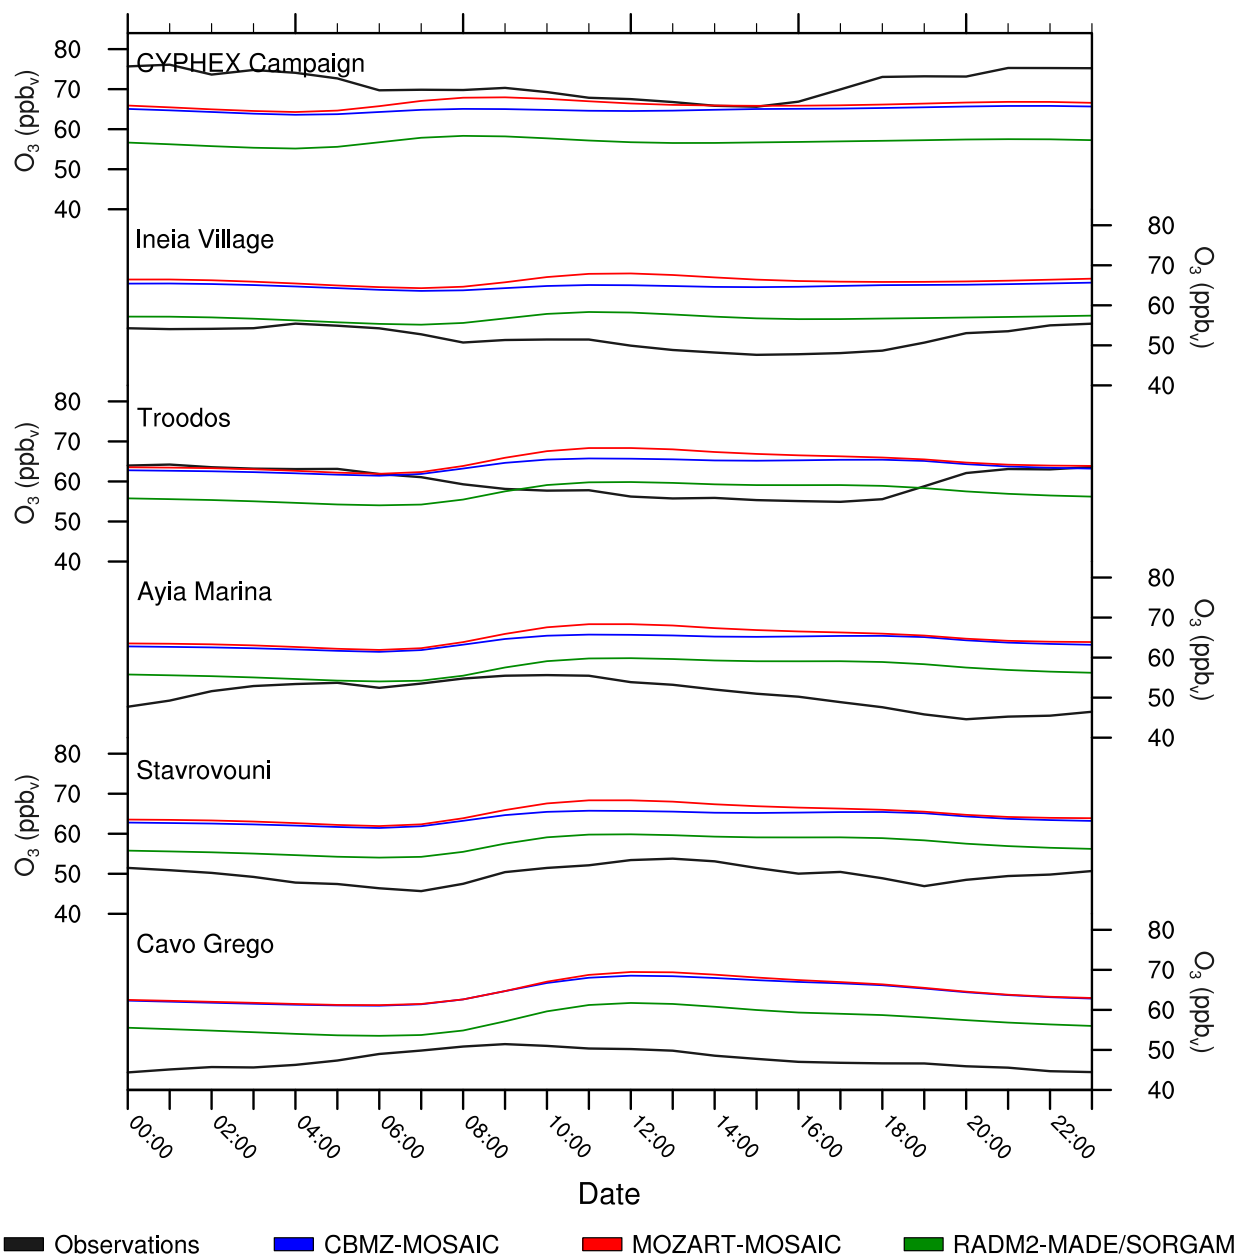

**Figure S2.** Observed (grey line) and modelled O<sub>3</sub> monthly mean diurnal cycles from the CBMZ-MOSAIC (blue line), MOZART-MOSAIC (red line), and RADM2-MADE/SORGAM (green line) mechanisms.

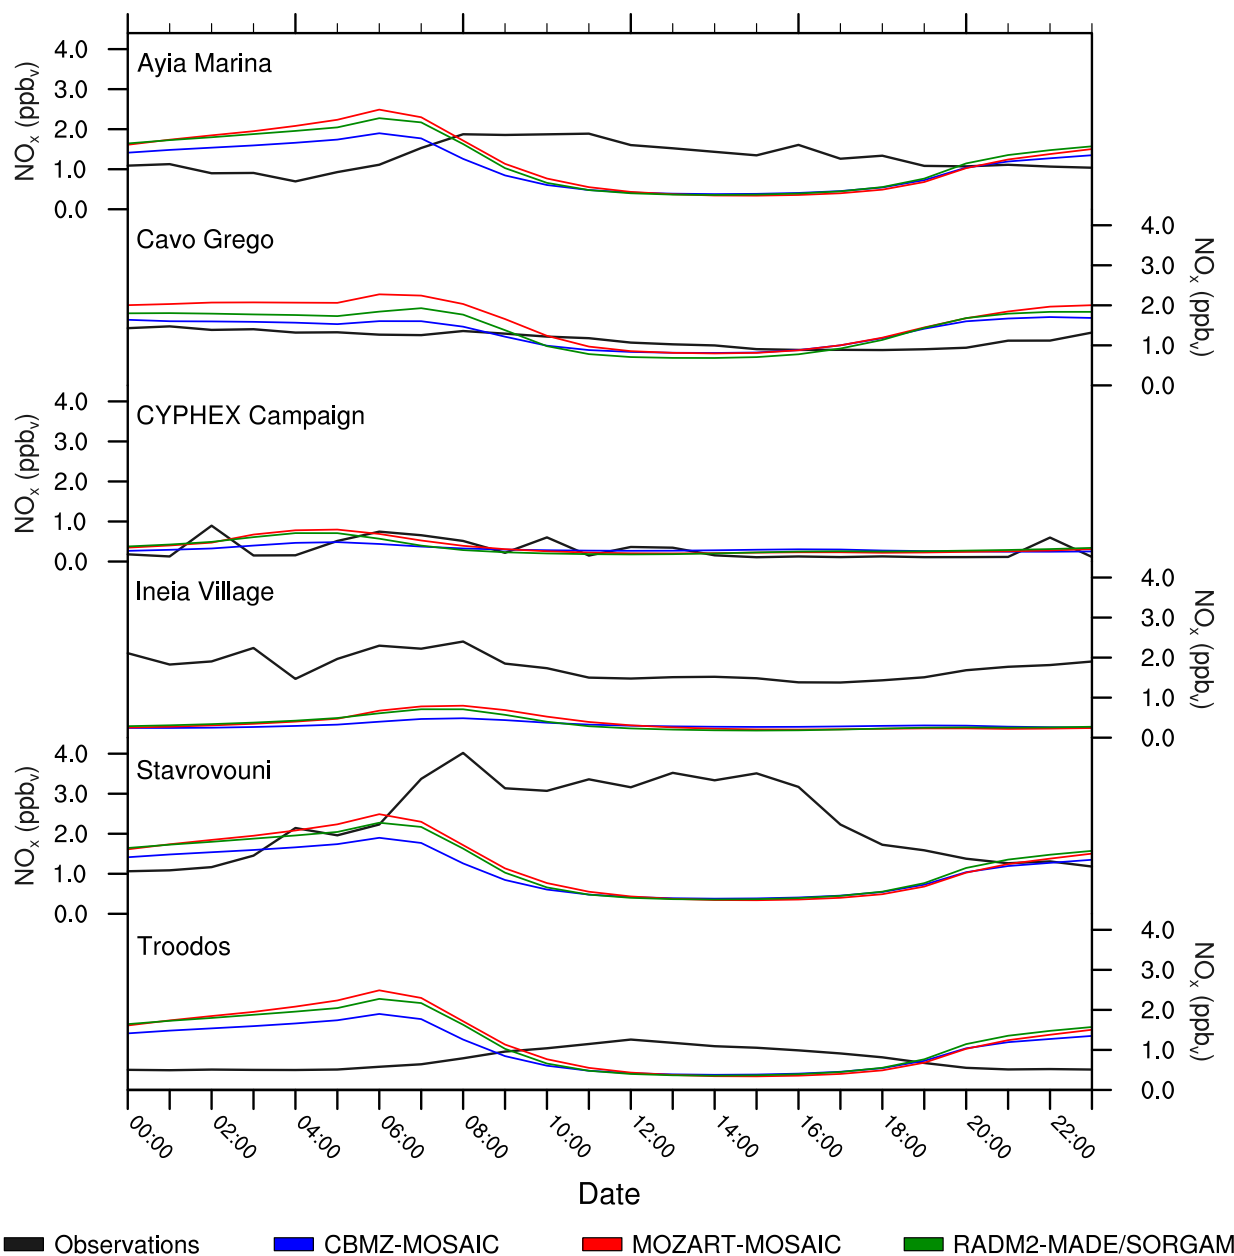

**Figure S3.** Observed (grey line) and modelled  $\text{NO}_x$  monthly mean diurnal cycles from the CBMZ-MOSAIC (blue line), MOZART-MOSAIC (red line), and RADM2-MADE/SORGAM (green line) mechanisms.

**Table S2.** Pearson’s Correlation Coefficient (R), Mean Bias (MB), Normalized Mean Bias (NMB), and Root Mean Squared Error (RMSE) of hourly values of O<sub>3</sub> and NO<sub>x</sub> for the global MOZART-4 model and all three domains of the CBMZ-MOSAIC (CM), MOZART-MOSAIC (MM), and RADM2-MADE/SORGAM (RMS) simulations, averaged over all stations. The CYPHEX campaign was excluded from the mean monthly calculations for O<sub>3</sub>. Hourly data availability exceeds 90% at all stations except NO<sub>x</sub> at the Ineia station (> 75%) and the CYPHEX campaign (> 82%).

|                      | Model/Mechanism       | Domain    | Resolution (km) | R     | MB    | NMB   | RMSE  |      |
|----------------------|-----------------------|-----------|-----------------|-------|-------|-------|-------|------|
| <b>O<sub>3</sub></b> | MOZART-4              | global    | ≈215            | 0.27  | 18.93 | 0.37  | 20.96 |      |
|                      | <b>CM</b>             | d1        | 80              | 0.18  | 12.18 | 0.24  | 15.65 |      |
|                      |                       | d2        | 16              | 0.21  | 11.21 | 0.22  | 14.97 |      |
|                      |                       | d3        | 4               | 0.24  | 10.98 | 0.22  | 14.79 |      |
|                      | <b>MM</b>             | d1        | 80              | 0.20  | 13.07 | 0.26  | 16.51 |      |
|                      |                       | d2        | 16              | 0.27  | 11.56 | 0.23  | 15.14 |      |
|                      |                       | d3        | 4               | 0.29  | 11.67 | 0.23  | 15.30 |      |
|                      | <b>RMS</b>            | d1        | 80              | 0.19  | 5.08  | 0.10  | 11.27 |      |
|                      |                       | d2        | 16              | 0.21  | 4.25  | 0.09  | 10.77 |      |
|                      |                       | d3        | 4               | 0.25  | 4.25  | 0.09  | 10.77 |      |
|                      | <b>NO<sub>x</sub></b> | MOZART-4  | global          | ≈215  | 0.09  | -0.70 | -0.43 | 1.82 |
|                      |                       | <b>CM</b> | d1              | 80    | -0.03 | -0.50 | -0.28 | 2.01 |
| d2                   |                       |           | 16              | 0.04  | -0.77 | -0.57 | 2.00  |      |
| d3                   |                       |           | 4               | 0.09  | -0.70 | -0.53 | 2.08  |      |
| <b>MM</b>            |                       | d1        | 80              | 0.00  | -0.36 | -0.16 | 2.10  |      |
|                      |                       | d2        | 16              | 0.07  | -0.69 | -0.51 | 2.02  |      |
|                      |                       | d3        | 4               | 0.11  | -0.63 | -0.48 | 2.09  |      |
| <b>RMS</b>           |                       | d1        | 80              | -0.01 | -0.41 | -0.21 | 2.08  |      |
|                      |                       | d2        | 16              | 0.05  | -0.67 | -0.49 | 2.03  |      |
|                      |                       | d3        | 4               | 0.08  | -0.57 | -0.44 | 2.10  |      |

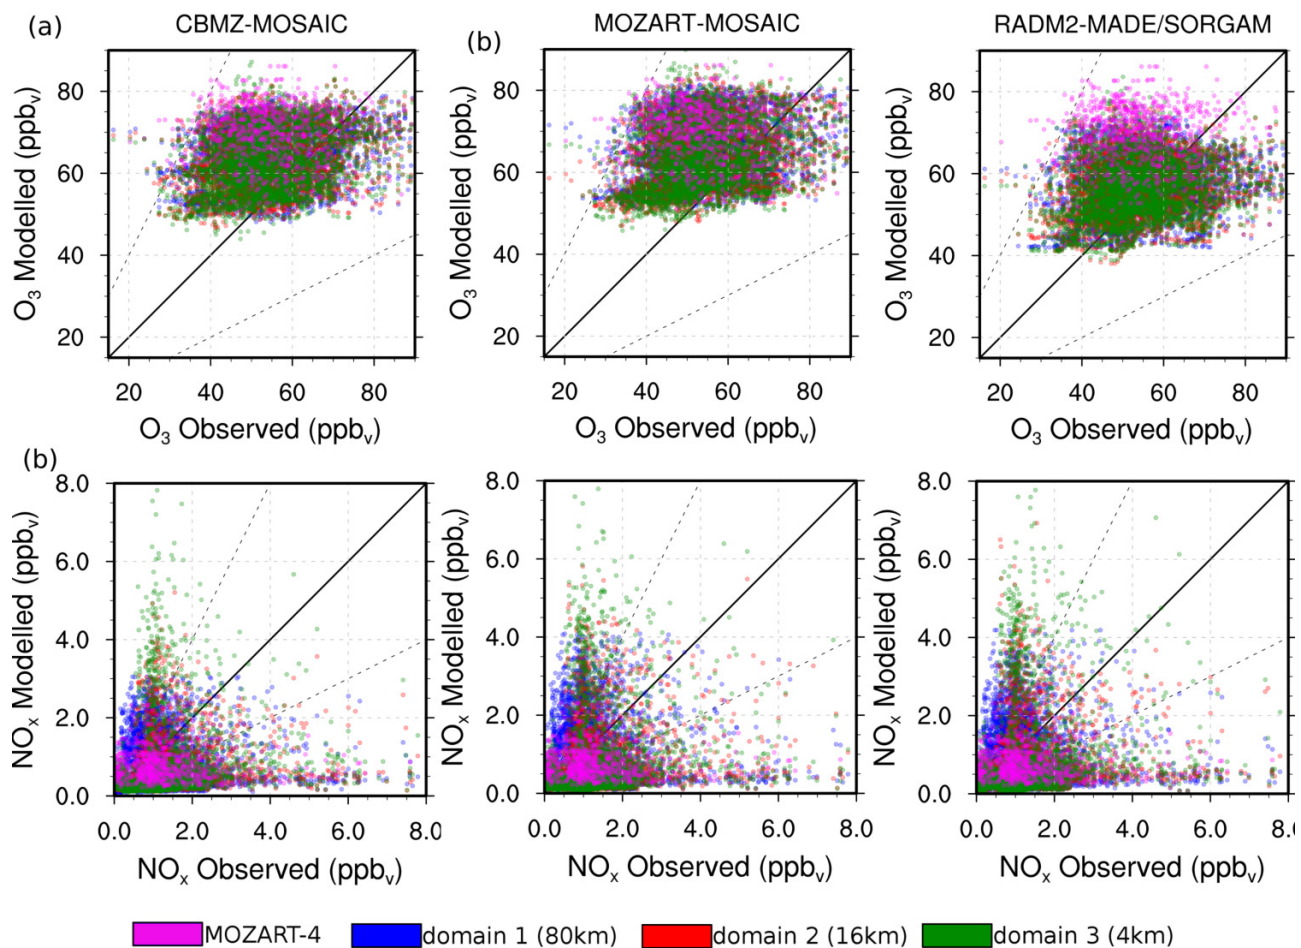

**Figure S4.** Comparison of observed and modelled  $O_3$  (a, first row) and  $NO_x$  (b, second row) concentrations at all stations from the CBMZ-MOSAIC (left column), MOZART-MOSAIC (central column), and RADM2-MADE/SORGAM (right column) mechanisms for the 80km (blue color), 16km (red color), and 4km (green color) domain of the simulations. The corresponding concentrations from the global MOZART-4 (215km) are also shown (magenta color).
